# Supplementary material
Source: PubMed Central journal article supplement (PMC6055183)
Supplement: pnas.1801338115.sapp.pdf [file pnas.1801338115.sapp.pdf]

## Repurposing isoxazoline veterinary drugs for control of vector-borne human diseases

Marie Miglianico<sup>1</sup>, Maarten Eldering<sup>1</sup>, Hannah Slater<sup>2</sup>, Neil Ferguson<sup>2</sup>, Pauline Ambrose<sup>3</sup>, Rosemary S. Lees<sup>3</sup>, Karin Koolen<sup>1</sup>, Katerina Pruzinova<sup>4</sup>, Magdalena Jancarova<sup>4</sup>, Petr Volf<sup>4</sup>, Constantianus J. M. Koenraadt<sup>5</sup>, Hans-Peter Duerr<sup>6</sup>, Graham Trevitt<sup>7</sup>, Baiyuan Yang<sup>8</sup>, Arnab K. Chatterjee<sup>8</sup>, John Wisler<sup>8</sup>, Angelika Sturm<sup>1</sup>, Teun Bousema<sup>9</sup>, Robert W. Sauerwein<sup>1,9</sup>, Peter G. Schultz<sup>8\*</sup>, Matthew S. Tremblay<sup>8\*</sup>, Koen J. Dechering<sup>1\*</sup>

<sup>1</sup> TropiQ Health Sciences, Nijmegen, The Netherlands

<sup>2</sup> MRC Centre for Outbreak Analysis and Modelling, Department of Infectious Disease Epidemiology, Imperial College London, UK

<sup>3</sup> The Liverpool Insect Testing Establishment (LITE), Liverpool School of Tropical Medicine, Liverpool, UK

<sup>4</sup> Department of Parasitology, Faculty of Science, Charles University, Prague, Czech Republic

<sup>5</sup> Laboratory of Entomology, Wageningen University and Research, Wageningen, The Netherlands

<sup>6</sup> Numerus Ltd., Tübingen, Germany

<sup>7</sup> XenoGesis Ltd., Nottingham, UK

<sup>8</sup> California Institute for Biomedical Research (Calibr), La Jolla, California, USA

<sup>9</sup> Department of Medical Microbiology, Radboud University Medical Center, Nijmegen, The Netherlands

\* Correspondence and requests for materials should be addressed to K.J. D.

([k.dechering@tropiq.nl](mailto:k.dechering@tropiq.nl)), M. S. T. ([mtremblay@calibr.org](mailto:mtremblay@calibr.org)) or P. G. S. ([schultz@calibr.org](mailto:schultz@calibr.org))

## SI Appendix

### Figures

A) afoxolaner

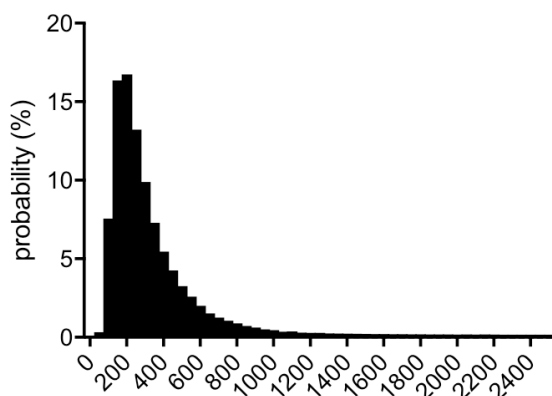

|                | value            |
|----------------|------------------|
| Minimum        | 40.77205         |
| 25% Percentile | 177.01635        |
| Median         | 257.64385        |
| 75% Percentile | 406.69165        |
| Maximum        | 6266.119         |
| Mean           | 360.439004427828 |
| Std. Deviation | 369.012165373013 |

B) fluralaner

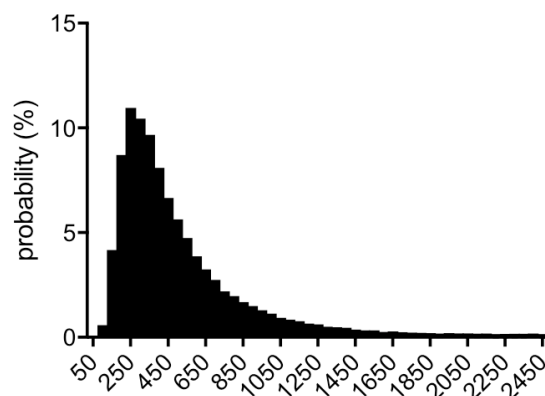

|                | value            |
|----------------|------------------|
| Minimum        | 65.08561         |
| 25% Percentile | 277.788125       |
| Median         | 407.8749         |
| 75% Percentile | 647.822675       |
| Maximum        | 9840.97          |
| Mean           | 578.470227481782 |
| Std. Deviation | 607.818054911775 |

### SI Appendix Figure S1:

Predicted human dose levels. Stochastic modeling was used to estimate the doses providing circulating drug levels above the *Anopheles/Aedes* IC<sub>99</sub> up till day 90 post dosing. The figure shows the distribution of the dose predictions for afoxolaner (A) and fluralaner (B) and the cognate summary statistics. For an average 70 kg subject the predicted median doses were 258 mg for afoxolaner and 408 mg for fluralaner which were rounded up to the nearest 10 mg in main body of the text to give values of 260 and 410 mg respectively.

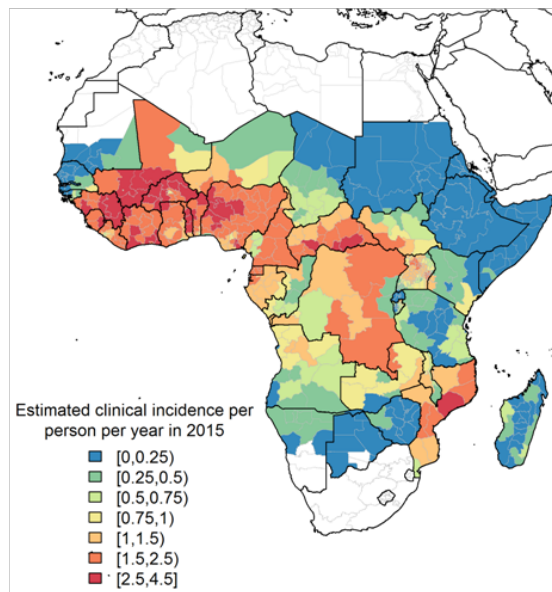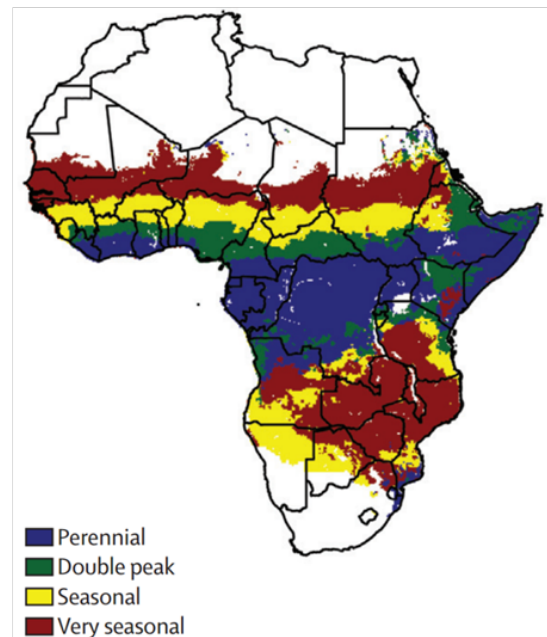

### SI Appendix Figure S2:

Estimated clinical incidence based on prevalence-incidence relationship in the Imperial College malaria model and the Malaria Atlas Project estimates for 2015 prevalence and seasonality profile based on rainfall data (1-3).

## Tables

|                          | Target        | Sodium channel   |                     |        | Acetylcholine esterase |                    | GABACl      |
|--------------------------|---------------|------------------|---------------------|--------|------------------------|--------------------|-------------|
|                          | Mutation type | kdr              |                     |        | Ace                    |                    | rdl         |
|                          | Family        | pyrethroid       |                     |        | carbamate              | organo-phosphate   |             |
|                          | Molecule      | 0.75% Permethrin | 0.05% Delta-methrin | 4% DDT | 0.1% Propoxur          | 1.0% Feni-trothion | 4% Dieldrin |
| <i>Anopheles gambiae</i> | Kisumu        | 100              | 100                 | 100    | 100                    | 100                | 96          |
|                          | Tiassale 13   | 22               | 10                  | 1      | 67                     | 100                | 22          |
| <i>Aedes aegypti</i>     | New Orleans   | 100              | 100                 | 91.7   | 100                    | 100                | 100         |
|                          | Cayman        | 13               | 42                  | 13     | 7.75                   | 100                | 91          |

### SI Appendix Table S1:

Characterization of the insecticide resistance in different strains of *Anopheles* and *Aedes* mosquitoes housed at the Liverpool Insect Testing Establishment using the standard WHO paper contact assay following exposure to the drugs indicated in the table. The results are shown as percentage mortality (on over 100 mosquitoes in each case), the red numbers indicate values that fall within the criteria for resistance (4).

|            |                      | Dog pharmacokinetics | Predicted human pharmacokinetics |
|------------|----------------------|----------------------|----------------------------------|
| Fluralaner | Oral bioavailability | 11-34%               | 25%                              |
|            | CL (mL/min/kg)       | 0.0972               | 0.0612                           |
|            | V (L/kg)             | 3.1                  | 3.1                              |
|            | Half-life (days)     | 15.0                 | 24.4                             |
| Afoxolaner | Oral bioavailability | 74%                  | 74%                              |
|            | CL (mL/min/kg)       | 0.0825               | 0.0519                           |
|            | V (L/kg)             | 2.68                 | 2.68                             |
|            | Half-life (days)     | 15.5                 | 24.4                             |

SI Appendix Table S2:

Estimation of pharmacokinetics parameters in human based on the published values found in dogs (5, 6). CL stands for plasma clearance and V for volume of distribution.

|            | <b>Rodent Study -<br/>No Adverse<br/>Effect Dose</b>     | <b>Rodent Study -<br/>Human<br/>Equivalent<br/>Dose</b> | <b>Dog Study -<br/>No Adverse<br/>Effect Dose</b>                                                     | <b>Dog Study -<br/>Human<br/>Equivalent<br/>Dose</b> |
|------------|----------------------------------------------------------|---------------------------------------------------------|-------------------------------------------------------------------------------------------------------|------------------------------------------------------|
| Fluralaner | Acute Rat/<br>Single Dose:<br>2,000 mg/kg                | 19,350 mg                                               | 24- Week; 3<br>Doses at 56 Day<br>Intervals:<br>280 mg/kg                                             | 9,333 mg                                             |
|            | 4-Week Rat;<br>Daily Repeat<br>Dose:<br>60 mg/kg         | 580 mg                                                  |                                                                                                       |                                                      |
|            | 90-Day Rat;<br>Daily Repeat<br>Dose:<br>40 mg/kg *       | 387 mg                                                  |                                                                                                       |                                                      |
|            | 90-Day Rat;<br>Daily Repeat<br>Dose:<br>400 mg/kg *      | 3,870 mg                                                |                                                                                                       |                                                      |
| Afoxalaner | Acute Rat/<br>Single Dose:<br>300 mg/kg                  | 2,900 mg                                                | 18-Week; 3<br>Doses at 30 Day<br>Intervals<br>followed by 3<br>doses every 2-<br>weeks:<br>31.5 mg/kg | 1,050 mg                                             |
|            | 7 or 12 Day<br>Mouse; Daily<br>Repeat Dose:<br>550 mg/kg | 2,682 mg                                                | 70-Day; Doses<br>every other<br>Week:<br>25 mg/kg                                                     | 833 mg                                               |
|            | 14-Day Rat;<br>Daily Repeat<br>Dose:<br>10 mg/kg         | 96 mg                                                   |                                                                                                       |                                                      |

SI Appendix Table S3:

Summary of published toxicological studies (7-12) carried out in rats, mice and dogs for approval of afoxolaner and fluralaner as a veterinary drug. Estimation are based on published guidelines (12), assuming a 60 kg human subject. (\*) NOAEL varies in interpretation based on EMA (10) (40mg/kg) and Australian MSDS (11) (400mg/kg).

## Supplemental Materials & Methods

### Allometric scaling of pharmacokinetics parameters

The dog PK parameters for both compounds have been reported previously (5, 6). Clearance (Cl) and volume of distribution (Vd) were scaled using fixed exponents of 0.75 and 1.0 respectively (typical values for both parameters (13, 14)) using the equations below.

$$Cl_{human} = Cl_{dog} * (BWT_{human}/BWT_{dog})^{0.75}$$

$$Vd_{human} = Vd_{dog} * (BWT_{human}/BWT_{dog})^{1.0}$$

The predicted human PK parameters for afoxolaner using this approach are  $Cl_{human} = 5.23$  L/d and  $Vd_{human} = 188$  L and for fluralaner  $Cl_{human} = 6.17$  L/d and  $Vd_{human} = 217$  L assuming a bodyweight (BWT) of 11 kg for dog at 70 kg in man.

### Human PK model and dose prediction

A single compartment model with a first order absorption at rate  $K_a$ , of drug with bioavailability  $F$  and first order rate of elimination  $K_e$  ( $=Cl/Vd$ ) was used to describe the concentration-time profile. The dose to achieve a target plasma concentration can be calculated from rearranging the equation that describes the plasma-concentration  $C(t)$  at time  $t$  using this model.

$$C(t) = F * Dose * K_a / (Vd * (K_a - K_e)) * (e^{-K_e * t} - e^{-K_a * t})$$

A nominal absorption rate ( $K_a$ ) of  $1\text{ h}^{-1}$  was used with nominal  $F$  values of 0.74 for afoxolaner (matched to the reported value in dog (5)) and 0.25 for fluralaner (range in dog is 0.20 to 0.34 (6)). The target plasma concentrations at day 90 were set at 65 nM (36 ng/mL) for fluralaner and 129 nM (81 ng/mL) for afoxolaner which correspond to the highest  $IC_{99}$  values of each compound among all tested *Aedes* and *Anopheles* species, based on data displayed in Figure 1C. To estimate variability, stochastic simulation (total of 100,000 simulations) was adopted using a fixed coefficient of variation of 20% with a log-normal distribution for each parameter used in the single compartment model:  $Cl$  (L/d),  $V$  (L),  $K_a$  (1/d) and  $F$ . No covariance has been used. Simulation artefacts with dose values tending to infinity (theoretically possible in the lognormal distribution) were removed by rejecting samples beyond the 99.9% quantile.

For *Culex* mosquitoes and *Phlebotomus* sand flies, the same PK model and doses were used to estimate the time frame with plasma concentration above  $IC_{99}$  (for *Culex* mosquitoes,  $200\text{ nM}=125\text{ ng/mL}$  for afoxolaner and  $105\text{ nM}=58\text{ ng/mL}$  for fluralaner; for *Phlebotomus*,  $407\text{ nM}=255\text{ ng/mL}$  for afoxolaner and  $1,445\text{ nM}=804\text{ ng/mL}$  for fluralaner). For *Lutzomyia* sand flies, as well as for *Phlebotomus* sand flies in the case of fluralaner, these doses were not sufficient to obtain a plasma concentration above  $IC_{99}$  at any time point.

### Modeling of malaria incidence

An existing transmission model describing the impact of another mosquitocidal drug, ivermectin, on malaria was extended to simulate the impact of afoxolaner or fluralaner on malaria incidence. All model parameters were as described previously (15) with the adaptations as described below. For fluralaner and afoxolaner we modeled a 90-day efficacy period, and a 2-year intervention scheme (1 intervention per year at the beginning of the transmission period). The model assumes that mosquitoes taking a bloodmeal containing either drug on any day during the 90 day efficacy window will experience reduced survival – mean lifespan is reduced from 7.6 days pre-intervention (1) to 2 days during the intervention. Mosquitoes were assumed to bite once every three days. This translates to less than 1% of the mosquitoes being able to survive until they complete sporogony (here conservatively estimated at 10 days). As the model is deterministic, we are only concerned with the ratio of mosquitoes to human, which in this simulation is assumed to vary between 13.7 mosquitoes per human at the peak of the rainy season and 0.006 at the lowest point of the dry season, with an average value of 4.9 across the whole year (in the absence of intervention). The vector to human ratio was selected to give a level of prevalence and incidence in the model that is commonly observed in areas of Africa with highly seasonal transmission (16) (i.e. prevalence by microscopy in 2-10 year olds of 27% and 0.9 cases of malaria per 0-5 year old per year). We assume no movement of mosquitoes into and out of the intervention area. Finally, we assume that a proportion ( $c$ ) of the human population over the age of 5 is treated, and only bloodmeals taken from treated individuals result in reduced survivorship. We simultaneously track the infectious state of the mosquito (susceptible, latently infected or infectious) to link the increase in vector mortality to a reduction in the infectious vector density and thus the rate of infections in humans.

The impact of afoxolaner/fluralaner was estimated in all malaria endemic areas in Africa. Each 1<sup>st</sup> administrative unit (top-level regional divisions) has a specific transmission intensity based on a prevalence-incidence relationship in the Imperial College malaria model and the Malaria Atlas Project estimates for 2015 prevalence, and seasonality profile based on rainfall data (3) (SI Appendix Figure S1). Mass drug administration (MDA) with a mosquitocidal drug efficacious for 90 days and with a coverage of 30% of the population over the age of five was simulated in each 1<sup>st</sup> administrative unit. The MDA was conducted at an optimal time based on the specific seasonality profile of each administrative unit. The map presented in Figure 3 is a simplified and illustrative approach to estimating the true impact of this intervention across Africa – in reality a wider range of complexities would need to be

considered, such as the vector species in each location (currently assumed to be all *Anopheles gambiae*-like), movement of individuals between locations, each individual country's national malaria strategy (in terms of planned increases in current interventions such as distribution of long-lasting insecticide-treated bed nets and access to treatment) and true achievable coverage and compliance in each area.

#### Modeling of Zika incidence

An existing Zika transmission model (17) was adapted to include an increased rate of vector mortality during the 90 day efficacy period of the drug of  $0.5cp\kappa/\text{day}$  where 0.5 translates into a mean lifespan of 2 days for mosquitoes biting a treated subject,  $c$  represents drug coverage in individuals over 5 years of age,  $p$  is the proportion of the population over 5 years of age ( $=0.908$  for the demography assumed) and  $\kappa$  is the biting rate per adult female mosquito ( $=0.5/\text{day}$ ). We simulate treatment occurring in one of twenty spatially coupled geographic regions (parameterized to represent Latin America) in a population with historical prior exposure to Zika but at a point in time where herd immunity has declined to the point where a new epidemic is able to occur. Treatment started within 2 months of the start of the new epidemic and is repeated exactly one year later. We track the annualized incidence of infection, and the cumulative infection incidence since the start of the epidemic.

## References

1. Griffin JT, Ferguson NM, & Ghani AC (2014) Estimates of the changing age-burden of *Plasmodium falciparum* malaria disease in sub-Saharan Africa. *Nature communications* 5:3136.
2. Cairns M, *et al.* (2012) Estimating the potential public health impact of seasonal malaria chemoprevention in African children. *Nature communications* 3:881.
3. Walker PG, Griffin JT, Ferguson NM, & Ghani AC (2016) Estimating the most efficient allocation of interventions to achieve reductions in *Plasmodium falciparum* malaria burden and transmission in Africa: a modelling study. *The Lancet. Global health* 4(7):e474-484.
4. World Health Organization Control of Communicable Diseases (1998) Test procedures for insecticide resistance monitoring in malaria vectors, bio-efficacy and persistence of insecticides on treated surfaces : report of the WHO informal consultation, Geneva, 28-30 September 1998.
5. Letendre L, *et al.* (2014) The intravenous and oral pharmacokinetics of afoxolaner used as a monthly chewable antiparasitic for dogs. *Veterinary parasitology* 201(3-4):190-197.
6. Kilp S, Ramirez D, Allan MJ, Roepke RK, & Nuernberger MC (2014) Pharmacokinetics of fluralaner in dogs following a single oral or intravenous administration. *Parasites & vectors* 7:85.
7. Committee for Medicinal Products for Veterinary Use (2016) CVMP assessment report for Bravecto for spot-on solution for dogs and cats. (European Medicines Agency).
8. Freedom of Information Summary (2014) Original New Animal Drug Application - Bravecto.
9. Freedom of Information Summary (2013) Original New Animal Drug Application - NexGard.
10. Committee for Medicinal Products for Veterinary Use (2013) CVMP assessment report for NexGard. (European Medicines Agency).
11. Merial Australia Pty Ltd (2014) Safety Data Sheet - NexGard.
12. Center for Drug Evaluation and Research (2005) Guide for Industry: Estimating the Maximum Safe Starting Dose in Initial Clinical Trials for Therapeutics in Adult Healthy Volunteers. (Food and Drug Administration).

13. Mordenti J, Chen SA, Moore JA, Ferraiolo BL, & Green JD (1991) Interspecies scaling of clearance and volume of distribution data for five therapeutic proteins. *Pharm Res* 8(11):1351-1359.
14. West GB, Brown JH, & Enquist BJ (1997) A general model for the origin of allometric scaling laws in biology. *Science* 276(5309):122-126.
15. Slater HC, Walker PG, Bousema T, Okell LC, & Ghani AC (2014) The potential impact of adding ivermectin to a mass treatment intervention to reduce malaria transmission: a modelling study. *The Journal of infectious diseases* 210(12):1972-1980.
16. Bhatt S, *et al.* (2015) The effect of malaria control on *Plasmodium falciparum* in Africa between 2000 and 2015. *Nature* 526(7572):207-211.
17. Ferguson NM, *et al.* (2016) EPIDEMIOLOGY. Countering the Zika epidemic in Latin America. *Science* 353(6297):353-354.
